# Supplementary material
Source: publisher site journal article supplement (https://en-cdn.bio-protocol.org/attached/file/20170910/Supplemental%20file.docx)
Supplement: Supplementary file 1 [file Supplemental%20file.docx]

**Table S1. Abbreviations**

| bp | basepairs |
| --- | --- |
| Ct | Cycle threshold |
| ddH2O | Double destilled water |
| dNTPs | Deoxynucleotide |
| g | Gravitational constant |
| gDNA | Genomic Deoxyribonucleic acid |
| h | hora/hour |
| K2PO4 | Di-Potassium Phosphate |
| KCl | Potassium Chloride |
| Kmer | all the possible substrings of length k that are contained in a string |
| MID | Multiplex identifier |
| min | minute |
| MiSeq | Microbiome Sequencing |
| mmol | micromolar |
| NaCl | Sodium Chloride |
| NTC | No Template Control |
| OTU | Operating Taxonimic Units |
| PBS | Phosphate-Buffered Saline |
| PCR | Polymerase Chain Reaction |
| pH | potential of hydrogen |
| pmol | picomolar |
| qPCR | Quantitative Polymerase Chain Reaction |
| Rpm | Rounds per minute |
| RT | Room Temperature |
| sec | seconds |
| TBE | Tris-Borat-EDTA buffer |
| UV | Ultraviolet |
| wsp | *Wolbachia specific* |
| µg | Microgram |
| µl | Microliter |

**Table S2.** **Reverse primer with tag-sequence and Adaptor A-sequence for 454-sequencing**

| **MID-identifier** | **Primer-name** | **Sequence 5’ – 3’** |
| --- | --- | --- |
| MID1 | V2_A_338R_tMID1 | CGTATCGCCTCCCTCGCGCCATCAGACGAGTGCGTCATGCTGCCTCCCGTAGGAGT |
| MID2 | V2_A_338R_tMID2 | CGTATCGCCTCCCTCGCGCCATCAGACGCTCGACACATGCTGCCTCCCGTAGGAGT |
| MID3 | V2_A_338R_tMID3 | CGTATCGCCTCCCTCGCGCCATCAGAGACGCACTCCATGCTGCCTCCCGTAGGAGT |
| MID4 | V2_A_338R_tMID4 | CGTATCGCCTCCCTCGCGCCATCAGAGCACTGTAGCATGCTGCCTCCCGTAGGAGT |
| MID5 | V2_A_338R_tMID5 | CGTATCGCCTCCCTCGCGCCATCAGATCAGACACGCATGCTGCCTCCCGTAGGAGT |
| MID6 | V2_A_338R_tMID6 | CGTATCGCCTCCCTCGCGCCATCAGATATCGCGAGCATGCTGCCTCCCGTAGGAGT |
| MID7 | V2_A_338R_tMID7 | CGTATCGCCTCCCTCGCGCCATCAGCGTGTCTCTACATGCTGCCTCCCGTAGGAGT |
| MID8 | V2_A_338R_tMID8 | CGTATCGCCTCCCTCGCGCCATCAGCTCGCGTGTCCATGCTGCCTCCCGTAGGAGT |
| MID9 | V2_A_338R_tMID9 | CGTATCGCCTCCCTCGCGCCATCAGTCTCTATGCGCATGCTGCCTCCCGTAGGAGT |
| MID10 | V2_A_338R_tMID10 | CGTATCGCCTCCCTCGCGCCATCAGTGATACGTCTCATGCTGCCTCCCGTAGGAGT |
| MID11 | V2_A_338R_tMID11 | CGTATCGCCTCCCTCGCGCCATCAGCATAGTAGTGCATGCTGCCTCCCGTAGGAGT |
| MID12 | V2_A_338R_tMID12 | CGTATCGCCTCCCTCGCGCCATCAGCGAGAGATACCATGCTGCCTCCCGTAGGAGT |
| MID13 | V2_A_338R_tMID13 | CGTATCGCCTCCCTCGCGCCATCAGATACGACGTACATGCTGCCTCCCGTAGGAGT |
| MID14 | V2_A_338R_tMID14 | CGTATCGCCTCCCTCGCGCCATCAGTCACGTACTACATGCTGCCTCCCGTAGGAGT |
| MID15 | V2_A_338R_tMID15 | CGTATCGCCTCCCTCGCGCCATCAGCGTCTAGTACCATGCTGCCTCCCGTAGGAGT |
| MID16 | V2_A_338R_tMID16 | CGTATCGCCTCCCTCGCGCCATCAGTCTACGTAGCCATGCTGCCTCCCGTAGGAGT |
| MID17 | V2_A_338R_tMID17 | CGTATCGCCTCCCTCGCGCCATCAGTGTACTACTCCATGCTGCCTCCCGTAGGAGT |
| MID18 | V2_A_338R_tMID18 | CGTATCGCCTCCCTCGCGCCATCAGACGACTACAGCATGCTGCCTCCCGTAGGAGT |
| MID19 | V2_A_338R_tMID19 | CGTATCGCCTCCCTCGCGCCATCAGCGTAGACTAGCATGCTGCCTCCCGTAGGAGT |

**Table S2. Continued**

| MID20 | V2_A_338R_tMID20 | CGTATCGCCTCCCTCGCGCCATCAGTACGAGTATGCATGCTGCCTCCCGTAGGAGT |
| --- | --- | --- |
| MID21 | V2_A_338R_tMID21 | CGTATCGCCTCCCTCGCGCCATCAGTACTCTCGTGCATGCTGCCTCCCGTAGGAGT |
| MID22 | V2_A_338R_tMID22 | CGTATCGCCTCCCTCGCGCCATCAGTAGAGACGAGCATGCTGCCTCCCGTAGGAGT |
| MID23 | V2_A_338R_tMID23 | CGTATCGCCTCCCTCGCGCCATCAGTCGTCGCTCGCATGCTGCCTCCCGTAGGAGT |
| MID24 | V2_A_338R_tMID24 | CGTATCGCCTCCCTCGCGCCATCAGACATACGCGTCATGCTGCCTCCCGTAGGAGT |
| MID25 | V2_A_338R_tMID25 | CGTATCGCCTCCCTCGCGCCATCAGACGCGAGTATCATGCTGCCTCCCGTAGGAGT |
| MID26 | V2_A_338R_tMID26 | CGTATCGCCTCCCTCGCGCCATCAGACTACTATGTCATGCTGCCTCCCGTAGGAGT |
| MID27 | V2_A_338R_tMID27 | CGTATCGCCTCCCTCGCGCCATCAGACTGTACAGTCATGCTGCCTCCCGTAGGAGT |
| MID28 | V2_A_338R_tMID28 | CGTATCGCCTCCCTCGCGCCATCAGAGACTATACTCATGCTGCCTCCCGTAGGAGT |
| MID29 | V2_A_338R_tMID29 | CGTATCGCCTCCCTCGCGCCATCAGAGCGTCGTCTCATGCTGCCTCCCGTAGGAGT |
| MID30 | V2_A_338R_tMID30 | CGTATCGCCTCCCTCGCGCCATCAGAGTACGCTATCATGCTGCCTCCCGTAGGAGT |
| MID31 | V2_A_338R_tMID31 | CGTATCGCCTCCCTCGCGCCATCAGATAGAGTACTCATGCTGCCTCCCGTAGGAGT |
| MID32 | V2_A_338R_tMID32 | CGTATCGCCTCCCTCGCGCCATCAGCACGCTACGTCATGCTGCCTCCCGTAGGAGT |
| MID33 | V2_A_338R_tMID33 | CGTATCGCCTCCCTCGCGCCATCAGCAGTAGACGTCATGCTGCCTCCCGTAGGAGT |
| MID34 | V2_A_338R_tMID34 | CGTATCGCCTCCCTCGCGCCATCAGCGACGTGACTCATGCTGCCTCCCGTAGGAGT |
| MID35 | V2_A_338R_tMID35 | CGTATCGCCTCCCTCGCGCCATCAGTACACACACTCATGCTGCCTCCCGTAGGAGT |
| MID36 | V2_A_338R_tMID36 | CGTATCGCCTCCCTCGCGCCATCAGTACACGTGATCATGCTGCCTCCCGTAGGAGT |
| MID37 | V2_A_338R_tMID37 | CGTATCGCCTCCCTCGCGCCATCAGTACAGATCGTCATGCTGCCTCCCGTAGGAGT |
| MID38 | V2_A_338R_tMID38 | CGTATCGCCTCCCTCGCGCCATCAGTACGCTGTCTCATGCTGCCTCCCGTAGGAGT |
| MID39 | V2_A_338R_tMID39 | CGTATCGCCTCCCTCGCGCCATCAGTAGTGTAGATCATGCTGCCTCCCGTAGGAGT |

**Table S2. Continued**

| MID40 | V2_A_338R_tMID40 | CGTATCGCCTCCCTCGCGCCATCAGTCGATCACGTCATGCTGCCTCCCGTAGGAGT |
| --- | --- | --- |
| MID41 | V2_A_338R_tMID41 | CGTATCGCCTCCCTCGCGCCATCAGTCGCACTAGTCATGCTGCCTCCCGTAGGAGT |
| MID42 | V2_A_338R_tMID42 | CGTATCGCCTCCCTCGCGCCATCAGTCTAGCGACTCATGCTGCCTCCCGTAGGAGT |
| MID43 | V2_A_338R_tMID43 | CGTATCGCCTCCCTCGCGCCATCAGTCTATACTATCATGCTGCCTCCCGTAGGAGT |
| MID44 | V2_A_338R_tMID44 | CGTATCGCCTCCCTCGCGCCATCAGTGACGTATGTCATGCTGCCTCCCGTAGGAGT |
| MID45 | V2_A_338R_tMID45 | CGTATCGCCTCCCTCGCGCCATCAGTGTGAGTAGTCATGCTGCCTCCCGTAGGAGT |
| MID46 | V2_A_338R_tMID46 | CGTATCGCCTCCCTCGCGCCATCAGACAGTATATACATGCTGCCTCCCGTAGGAGT |
| MID47 | V2_A_338R_tMID47 | CGTATCGCCTCCCTCGCGCCATCAGACGCGATCGACATGCTGCCTCCCGTAGGAGT |
| MID48 | V2_A_338R_tMID48 | CGTATCGCCTCCCTCGCGCCATCAGACTAGCAGTACATGCTGCCTCCCGTAGGAGT |
| MID49 | V2_A_338R_tMID49 | CGTATCGCCTCCCTCGCGCCATCAGAGCTCACGTACATGCTGCCTCCCGTAGGAGT |
| MID50 | V2_A_338R_tMID50 | CGTATCGCCTCCCTCGCGCCATCAGAGTATACATACATGCTGCCTCCCGTAGGAGT |

**Forward primer ist he same for all reverse MIDs:**

V2_B_Pyro_27F CTATGCGCCTTGCCAGCCCGCTCAGTCAGAGTTTGATCCTGGCTCAG
